# Supplementary material for: Reduction of De Novo Lipogenesis Mediates Beneficial Effects of Isoenergetic Diets on Fatty Liver: Mechanistic Insights from the MEDEA Randomized Clinical Trial
Source: MDPI journal article supplement (doi:10.3390/nu14102178), 2022-05-23
Supplement: s1 [file s1]

Patients with type 2 diabetes  
screened for eligibility (n=66)

Excluded (n=17):

- declined to participate (n=10)
- contraindication to  $H^1$ -MRS (n=6)
- BMI <27 kg/m<sup>2</sup> (n=1)

Enrolled and randomly assigned to treatment (n=49)

MUFA diet (n=26)

Multifactorial diet (n=23)

Discontinued treatment (n=4):

- unwilling to comply with diet (n=2)
- withdrew for personal reasons (n=2)

Discontinued treatment (n=2):

- withdrew consent (n=1)
- unwilling to comply with diet (n=1)

Completed the trial (n=22)

Completed the trial (n=21)

Fatty acids, serum  
triglycerides  
available (n=20)

Fatty acids, serum  
triglycerides  
available (n=17)
